# Supplementary material for: Clues on the dynamics of DNA replication in Giardia lamblia
Source: Oxford University Press journal article supplement (doi:10.1242/jcs.260828), 2023-05-09
Supplement: jcs260828supp.pdf [file jcs260828supp.pdf]

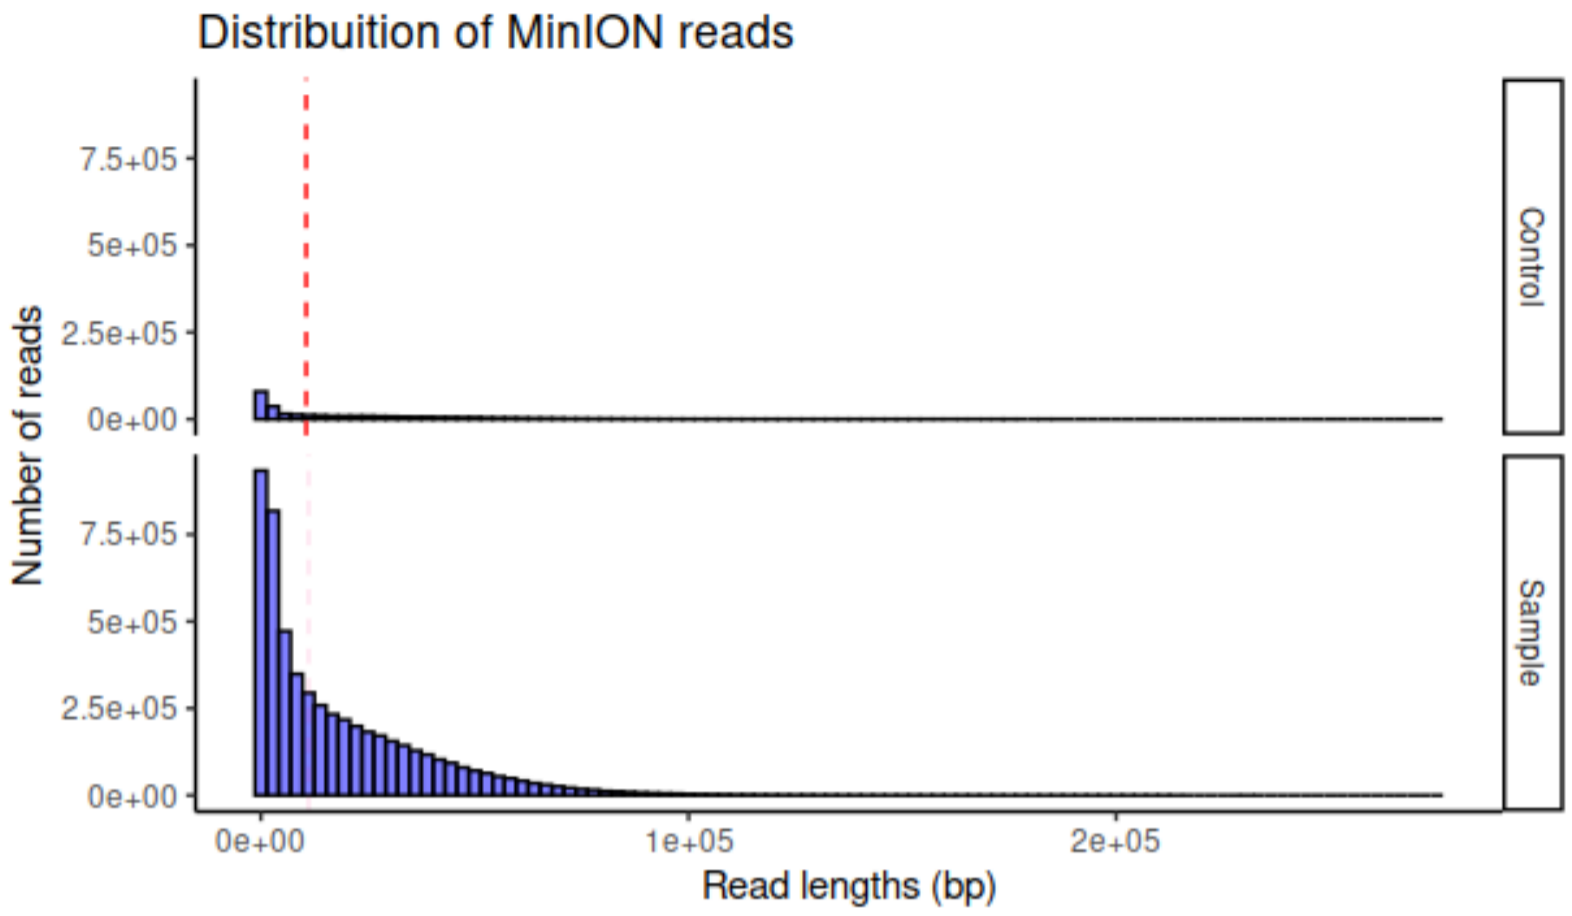

Fig. S1. Nanopore sequencing reads after base calling.

### A) Rightward moving fork

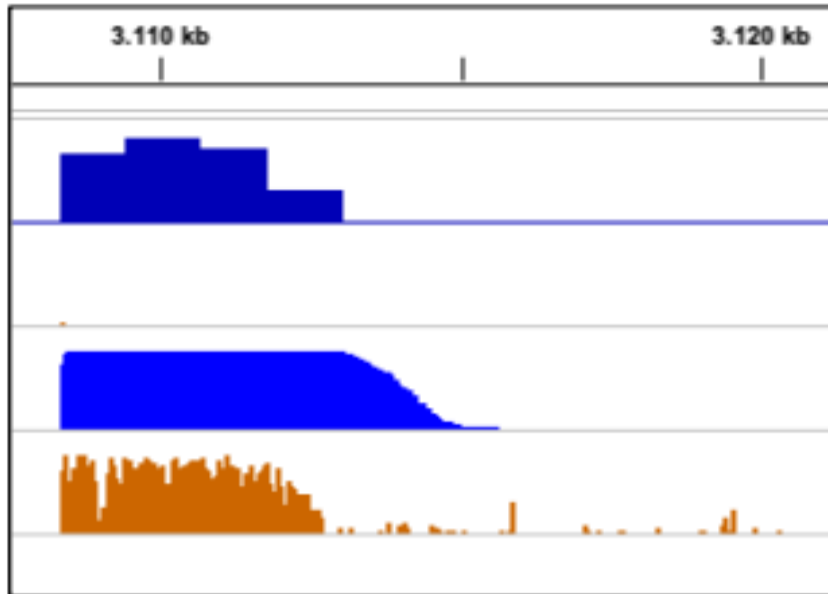

### B) Leftward moving fork

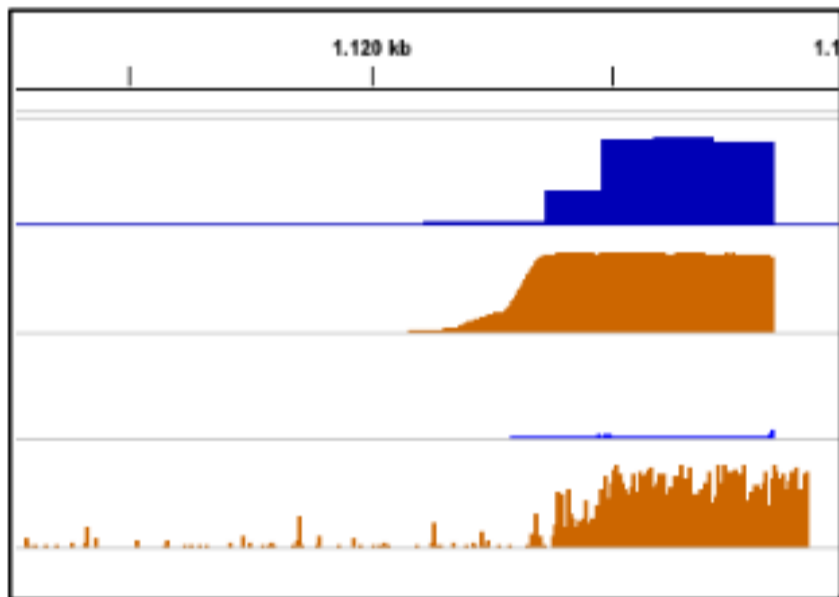

### C) Bidirectional moving forks

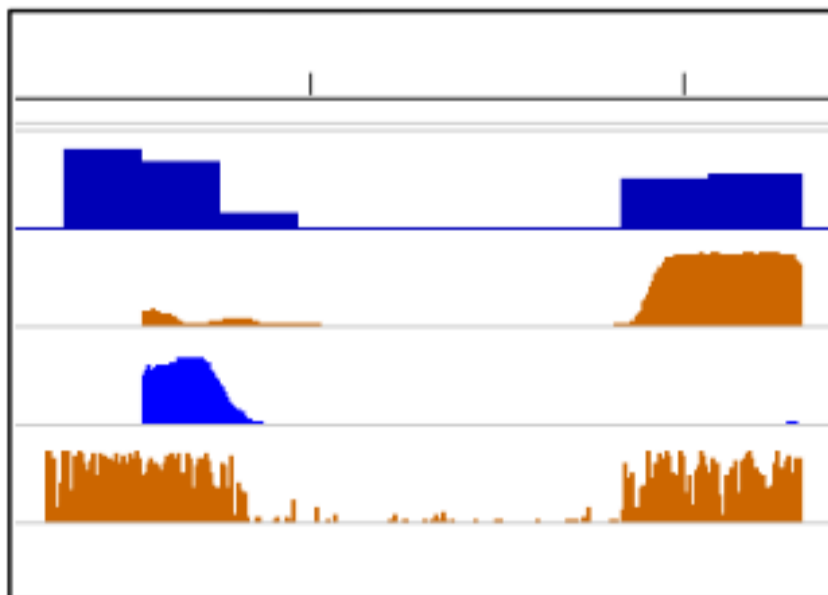

**Fig. S2. Detection of BrdU-incorporated nanopore sequenced molecules and movement of replication forks analyzed by DNAscent.** Bedgraphs visualized in IGV showing the probability of BrdU called at each thymidine position for three selected reads (**A-C**). Each read is represented by a group of four tracks: profile of BrdU detection (upper track), probability of a leftward moving fork (upper-middle track), probability of a rightward moving fork (lower-middle track), probability of BrdU at each thymidine position (lower track) from DNAscent forksense.

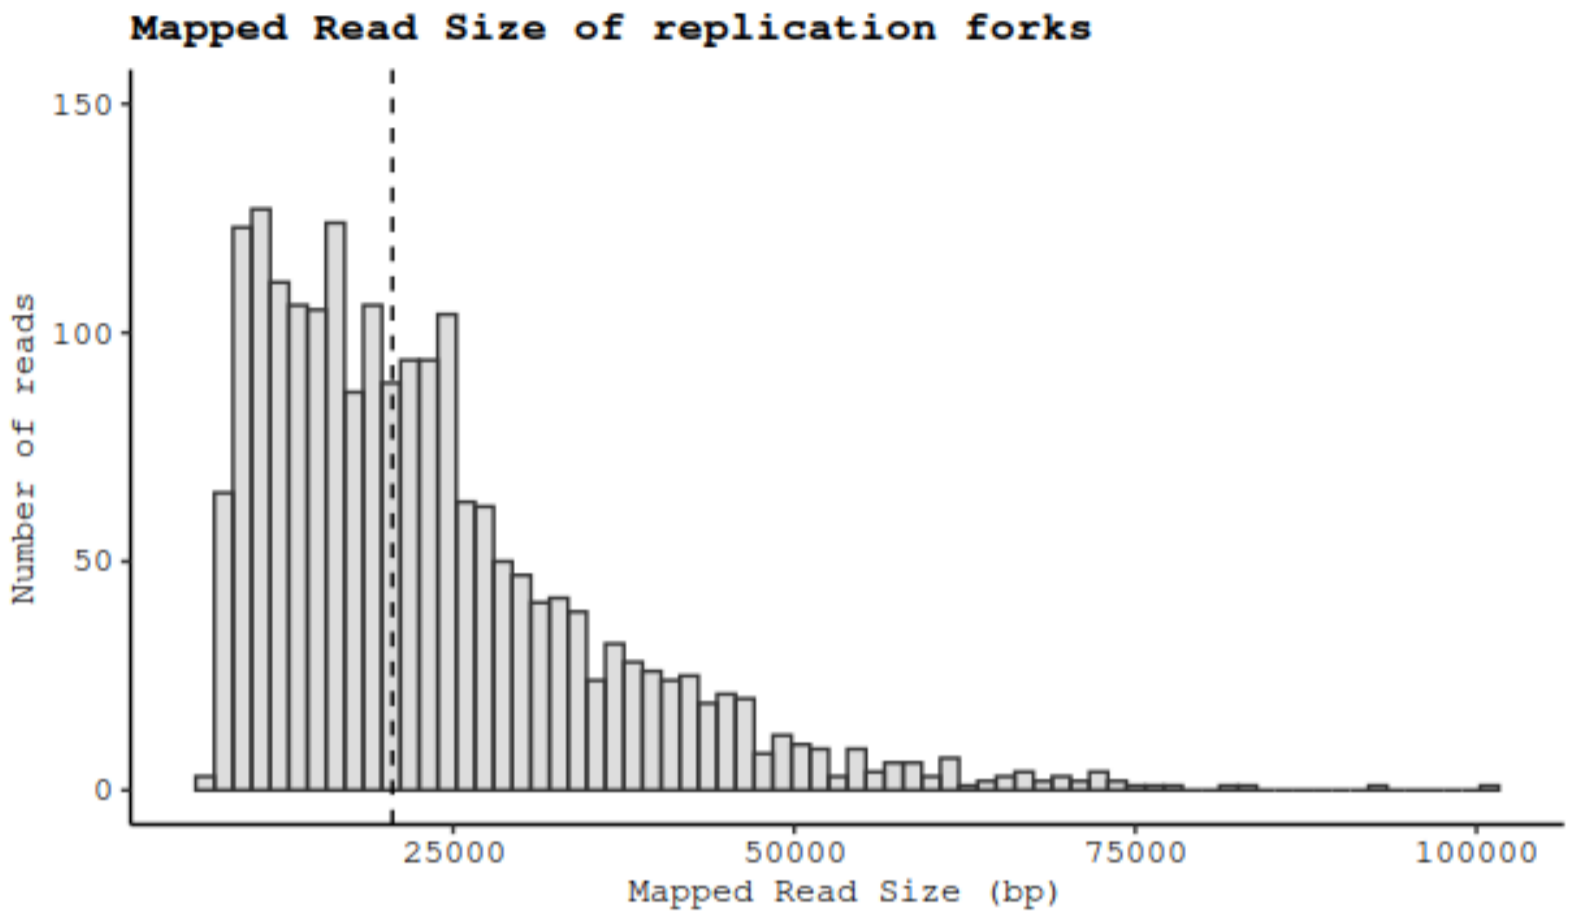

**Fig. S3. Mapped read size of replication forks.**

**Table S1. BrdU positive reads analyzed by DNAscent.** Regions containing fork direction were plotted and matched with the annotated genome to analyze replication fork and transcription directions and evaluate potential HoRT collisions.

[Click here to download Table S1](#)

**Table S2. MinION sequencing data and DNAscent analysis summary.**

| Experiment                                         | MinION runs | MinION reads | Estimated bases (Gb) | Average read length (bp) | Mapped read (%) | Positive BrdU molecules (probability $\geq 70\%$ ) | %Positive reads | Input DNA per run ( $\mu\text{g}$ ) |
|----------------------------------------------------|-------------|--------------|----------------------|--------------------------|-----------------|----------------------------------------------------|-----------------|-------------------------------------|
| Giardia intestinalis trophozoites negative control | 1           | 29770        | 0.58                 | 41220                    | 91.23           | 9                                                  | 0.09            | 5                                   |
| Giardia intestinalis trophozoites BrdU 300UMa      | 1           | 90130        | 1.3                  | 38110                    | 94.94           | 286                                                | 0.32            | 5                                   |
| Giardia intestinalis trophozoites BrdU 300UMb      | 2           | 455750       | 8.86                 | 30460                    |                 | 3377                                               | 0.74            | 5                                   |
